# Supplementary material
Source: PubMed Central journal article supplement (PMC3716348)
Supplement: supp_WNL.0b013e318293e2ce_e-References.pdf [file supp_WNL.0b013e318293e2ce_e-References.pdf]

## **e-References**

e1) American Academy of Neurology. Neurology Workforce Data [online]. Available at:

<http://www.aan.com/globals/axon/assets/9008.pdf>. Accessed April 29, 2012.

e2) Connelly J. Doctors Are Opting Out of Medicare. In: The New York Times 2009. Available

at: <http://www.nytimes.com/2009/04/02/business/retirementspecial/02health.html>. Accessed July 1, 2012.

e3) American Board of Psychiatry and Neurology. Certification and Status Verification System

[online]. Available at: <https://application.abpn.com/verifycert/verifycert.asp>. Accessed October 13, 2012.

e4) The American Board of Neurological Surgery. Directory of Diplomats [online]. Available at:

<http://www.abns.org/diplomates/default.aspx>. Accessed October 13, 2012.

e5) Robinson R. DaTscan Approved for Dopamine Transporter Imaging; Skeptics Doubt Clinical Value. *Neurology Today* 2011;11:24-25.

e6) Massachusetts Medical Society Physician Workforce Study [online]. Available at:

<http://www.massmed.org/AM/TemplateRedirect.cfm?Template=/CM/ContentDisplay.cfm&ContentID=61512>. Accessed July 1, 2012.

e7) Anderson H, Rydell CM. Neurologist shortage "critical". *Minnesota medicine* 2012;95:6.

e8) Fiegl C. Medicare 27.4% doctor pay cut set for 2012 unless Congress acts [online]. Available

at: <http://www.ama-assn.org/amednews/2011/11/14/gv111114.htm>. Accessed May 27, 2012.

e9) Bynum JPW. Characteristics, Costs & Health Service Use For Medicare Beneficiaries with a

Dementia Diagnosis: Report 1: Medicare Current Beneficiary Survey. Lebanon, NH: Dartmouth

Institute for Health Policy and Clinical Care, Center for Health Policy Research, January 2009.

- e10) Tuition and Student Fees Reports. In: Association of American Medical Colleges. Available at: [http://services.aamc.org/tsfreports/select.cfm?year\\_of\\_study=2011](http://services.aamc.org/tsfreports/select.cfm?year_of_study=2011). Accessed July 31, 2012.
- e11) Jolly P. Medical School Tuition and Young Physician Indebtedness: An Update to the 2004 Report. Washington, DC: Association of American Medical Colleges, 2007.
- e12) A bill to amend title XVIII of the Social Security Act to include neurologists as primary care physicians for purposes of incentive payments for primary care services under the Medicare program. 112th Congress, 2011-2012.
- e13) Improving Physician Access in Teaching Hospitals (PATH) Act of 2011. 112th Congress, 2011-2012.
- e14) Roy CM, Cain R. The involvement of people living with HIV/AIDS in community-based organizations: contributions and constraints. *AIDS care* 2001;13:421-432.
- e15) We Can't Wait: Taking Action on Alzheimer's Disease [online]. Available at: <http://www.whitehouse.gov/blog/2012/02/09/we-can-t-wait-taking-action-alzheimer-s-disease>. Accessed June 6, 2012.
- e16) Reimbursement for DaTscan (Ioflupane I 123 Injection) [online]. Available at: [http://md.gehealthcare.com/files/DaTscan\\_FAQs\\_2-22-12.pdf](http://md.gehealthcare.com/files/DaTscan_FAQs_2-22-12.pdf). Accessed October 13, 2012.
- e17) Phelps CE. *Health Economics*: Addison Wesley, 2003.
- e18) Physicians by medical speciality - Absolute numbers and rate per 100,000 inhabitants. In: DataMarket [online]. Available at: <http://datamarket.com/data/set/18gb/physicians-by-medical-speciality-absolute-numbers-and-rate-per-100000-inhabitants#!display=line>. Accessed July 1, 2012.

e19) Medical Labour Force Survey, 2009. In: Australian Institute for Health and Welfare [online]. Available at: <http://www.aihw.gov.au/publication-detail/?id=10737419680>. Accessed July 1, 2012.

e20) Supply, Distribution and Migration of Canadian Physicians, 2009. In: Scott's Medical Database, Canadian Institute for Health Information [online]. Available at: <https://secure.cihi.ca/estore/productFamily.htm?locale=en&pf=PFC1567>. Accessed July 1, 2012.

e21) Annual Labor Force Statistics Summary tables: Population, 2012. In: Organization for Economic and Co-operation Development [online]. Available at: <http://stats.oecd.org/Index.aspx?QueryId=451>. Accessed July 1, 2012.
